# Supplementary material for: What Clinicians Say About the Experience of Working With Individuals on Community Treatment Orders
Source: Atypon-hosted journal article supplement (doi:10.1176/appi.ps.201700492), 2018-04-26
Supplement: appi.ps.201700492.ds001.pdf [file appi.ps.201700492.ds001.pdf]

## **APPENDIX 1**

### ***Search Terms***

A database search of Psych Info, Medline, EMBASE, and CINAHL using the search terms CTO” OR “community treatment order” OR “community treatment orders” OR “mandatory outpatient” OR mandatory outpatient treatment OR mandatory outpatient release OR mandatory outpatient commitment OR “involuntary outpatient” OR “IOT” OR involuntary outpatient treatment OR involuntary outpatient release OR involuntary outpatient commitment OR “outpatient commitment” OR “OPC” OR “involuntary commitment” OR “assisted outpatient treatment” OR “AOT” OR conjunction of civil commitment OR “OPC” OR "outpatient commitment" OR “conditional release” AND qualitative OR “ lived experience” OR “lived experiences” OR “client perspective” OR “client perspectives” OR “stakeholder view “OR ”stakeholder views” OR “ qualitative review” OR “qualitative reviews” OR “qualitative study” OR “qualitative studies” OR “qualitative investigation” OR “qualitative research” OR ethnography OR ethnology OR “narrative therapy” OR “philosophical inquiry” OR “grounded theory” OR “participant action” OR “phenomenology” OR experience OR experiences OR perception OR perceptions OR interview OR interviews was completed.

### **Gray Literature**

A Google search using the terms: “Community Treatment Orders and qualitative research” produced 25,300,000 hits. Given the large number of hits, the research assistant then searched until 2 consecutive pages included links that were no longer relevant to the topic, for example if page 3 and 4 of the Google search were all irrelevant, then any pages after that were not searched.
